# Supplementary material for: Unraveling the timescale of the structural photo-response within oriented metal–organic framework films
Source: Royal Society of Chemistry journal article supplement (doi:10.1039/d2sc02405e), 2022-01-01
Supplement: d2sc02405e1.pdf [file d2sc02405e1.pdf]

# Supplementary Information

## Unraveling the timescale of the structural photo-response within oriented Metal-Organic Framework films

Sumea Klokic,<sup>[a]</sup> Denys Naumenko,<sup>[a]</sup> Benedetta Marmiroli,<sup>[a]</sup> Francesco Carraro,<sup>[b]</sup> Mercedes Linares-Moreau,<sup>[b]</sup> Simone Dal Zilio,<sup>[c]</sup> Giovanni Birarda,<sup>[d]</sup> Rupert Kargl,<sup>[e]</sup> Paolo Falcaro,<sup>[b]</sup> Heinz Amenitsch\*<sup>[a]</sup>

<sup>a</sup>Institute of Inorganic Chemistry, Graz University of Technology, 8010 Graz, Austria, Email: [heinz.amentisch@tugraz.at](mailto:heinz.amentisch@tugraz.at)

<sup>b</sup>Institute of Physical and Theoretical Chemistry, Graz University of Technology  
8010 Graz, Austria

<sup>c</sup>IOM-CNR, Laboratorio TASC, S.S. 14, 163.5 km, Basovizza, Trieste 34149, Italy

<sup>d</sup>Elettra Sincrotrone Trieste – SISSI Bio Beamline, S.S. 14, 163.5 km, Basovizza, Trieste 34149, Italy

<sup>e</sup>Institute of Chemistry and Technology of Bio-Based Systems, Graz University of Technology, 8010 Graz, Austria

## Table of contents

|                                                                                           |    |
|-------------------------------------------------------------------------------------------|----|
| 1. Experimental                                                                           | 2  |
| 2. System design and characterization                                                     | 7  |
| 3. Degree of orientation evaluation                                                       | 9  |
| 4. Quartz crystal microbalance (QCM) measurements                                         | 11 |
| 5. Azobenzene infiltration process into DMOF-1 films                                      | 13 |
| 6. Polarization angle-dependent absorption measurements at 343 nm                         | 16 |
| 7. Time-resolved <i>in-situ</i> Grazing Incidence Small Angle X-Ray Scattering            | 18 |
| 8. Photo-switching experiments in bulk DMOF-1                                             | 21 |
| 9. IR experiments – photo-isomerization of azobenzene within the DMOF-1/AB film structure | 22 |
| 10. Calculation of the azobenzene loading                                                 | 23 |
| 11. Influence of orientation on the photo-switching of DMOF-1/AB films                    | 24 |
| 12. Infrared measurements for DMOF-1/AB ON/OFF photo-cycling                              | 25 |

## References

## 1. Experimental

### Materials and methods

All chemicals and solvents are available commercially and were used as received without any further purification. Experiments were performed at ambient pressure and the products are stable at ambient conditions.

#### Preparation of DMOF-1-on-Cu<sub>2</sub>BDC<sub>2</sub>-on-Cu(OH)<sub>2</sub> films

Copper hydroxide nanobelts were synthesized following the standard protocol described in ref. [1a] and were deposited on sodalime glass substrates following the automated deposition procedure.<sup>[2]</sup> Prior deposition, the glass substrates (Roth Karlsruhe microscope slides, 1.5 cm x 1.5 cm x 1 mm) were pre-cleaned with distilled water and absolute ethanol. The nanobelt films were fabricated according to the automated nanobelt deposition method,<sup>[2]</sup> then washed by ethanol and dried in a nitrogen stream prior to their conversion to Cu<sub>2</sub>BDC<sub>2</sub>, which was performed by immersing the films in a saturated 10 mL terephthalic acid ligand solution (0.65 g in 21 mL dist. water and 56 mL ethanol) at room temperature for 10 minutes. The converted films were washed by ethanol and dried as before. The films were subsequently immersed in 10 mL of an ethanolic zinc acetate solution (25.1 mg Zinc acetate dihydrate in 100 mL ethanol) for two hours, washed gently by ethanol and dried. Conversion to the **DMOF-1**<sup>[7]</sup> film was subsequently accomplished at 60 °C (heating oven) by tightly sealing the film in a vial containing 10 mL of a methanolic terephthalic acid (7.2 mg) and DABCO (4.8 mg; 1,4-diazabicyclo[2.2.2]octan) solution for 90 min (Figure 1 (a)). The converted film was left to cool to room temperature prior to washing with ethanol and drying. The samples were kept under environmental conditions prior and upon infiltration with azobenzene.

CuOH<sub>2</sub>: **ATR**  $\nu$  = 3613, 3305 cm<sup>-1</sup> (O-H stretch), 930 cm<sup>-1</sup> (C-O stretch)

**DMOF-1**: **ATR**  $\nu$  = 746 cm<sup>-1</sup>, 1060 cm<sup>-1</sup> (N-C-H), 1393 cm<sup>-1</sup>, 1630 cm<sup>-1</sup> (C=O, C-O stretching modes), 687 cm<sup>-1</sup> (*trans*-azobenzene), 697 cm<sup>-1</sup> (*cis*-azobenzene)

59 Azobenzene: **UV-Vis** (acetone, 25°C):  $\lambda_{\text{trans-azobenzene}} = 340 \text{ nm}$  ( $\epsilon = 9\,939 \text{ M}^{-1} \text{ cm}^{-1}$ )

## 60 **Grazing Incidence Small Angle X-Ray Scattering (GIWAXS) Experiments**

61 GIWAXS measurements on the photo-switching of the grown **DMOF-1** structures as well as  
62 measurements prior and upon infiltration by azobenzene were performed at the Austrian SAXS  
63 beamline at ELETTRA, Trieste, Italy.<sup>[3]</sup> An X-Ray beam with a wavelength of 1.54 Å (beam  
64 energy 8 keV) was used with a sample to detector distance of 515 mm providing a  $q$ -range  
65 from  $0.08 < q < 17 \text{ nm}^{-1}$ , where  $q$  denotes the length of the scattering vector ( $q = \frac{4\pi}{\lambda} \sin\left(\frac{2\theta}{2}\right)$ ,  $\lambda$   
66 being the wavelength and  $\theta$  the scattering angle). The beam size was 0.1 x 0.4 mm (v x h).  
67 The angular scale of the detector was calibrated with silver behenate. The samples were mount  
68 on a motorized stage with a resolution of 0.001°. Incident grazing angles were in the range 0.2  
69 – 0.3°. For static measurements of the pristine **DMOF-1** thin film prior and after azobenzene  
70 infiltration, the 2D GIWAXS patterns were acquired for 60 sec. During the photoexcitation  
71 experiments the patterns were acquired for 0.99 s due to the fast kinetics of the structural  
72 transformations. A Pilatus3 1M detector was used (Dectris Ltd, Baden Switzerland with active  
73 area 169 x 179 mm<sup>2</sup> and a pixel size of 172 µm) and the detector images were processed  
74 using SAXSDOG, a software developed at the Austrian SAXS beamline for automatic data  
75 reduction.<sup>[4]</sup> For data analysis, the diffraction patterns of the vertical cut  $q_V$  in the out-of-plane  
76 direction, the horizontal cut  $q_H$  in the in-plane direction as well as radial integration were  
77 considered (Figure S1, a). The full 2D pattern radial integration was performed for time-  
78 resolved measurements for a better signal to noise ratio. The integrated data were processed  
79 with IGOR pro (Wavemetrics, Inc., Lake Oswego, OR). Crystalline phases were associated by  
80 using the software GSAS-II<sup>[5]</sup> and by indexing the relative positions of the Bragg peaks from  
81 the scattering patterns. To study the photo-switching behavior of the guest-host system with  
82 time-resolved GIWAXS, data were recorded prior to the initiation of the azobenzene  
83 isomerization with UV light and throughout the entire subsequent host adaptation until no  
84 significant changes in the structure were observed for at least one minute.

## 85 Photo-excitation experiments

86 In this study we employ the flexible **DMOF-1** structure<sup>[6]</sup> to study the structural transitions when  
87 infiltrated with azobenzene.<sup>[7]</sup> We chose the heteroepitaxial growth of **DMOF-1** starting from  
88 the Cu<sub>2</sub>BDC<sub>2</sub>-on-Cu(OH)<sub>2</sub> structure as this approach provides a controlled growth<sup>[1a,8]</sup> of the  
89 **DMOF-1** that allows to limit the film thickness. Photo-switching experiments were performed  
90 in combination with time-resolved GIWAXS measurements utilizing the optical on-line table  
91 installed at the Austrian SAXS beamline.<sup>[9]</sup> The sample is positioned on the sample holder,  
92 whilst the laser beam is transferred from the optical hutch to the sample position by a  
93 specifically designed assembly of motorized optical mirrors and lenses to adjust the incident  
94 angle and thus the irradiation spot. The light source to initiate the photo-switch was delivered  
95 by the femtosecond laser (Yb:KGW) operating with the third harmonic at 343 nm (250 fs pulse  
96 width). We employ a femtosecond laser source to precisely control the photon-flux and thus  
97 the photo-response of **DMOF-1/AB**.<sup>[9]</sup> The laser power was chosen with 8090 mW (RA 25 A)  
98 to switch the **DMOF-1/AB** films with a power density of 94.8 mW cm<sup>-2</sup>. The laser spot size was  
99 set with 3.5 mm (FWHM). For the reversion of the system a blue LED diode operating at  
100 450 nm (PL450B, OSRAM Opto Semiconductors) was installed inside the optical table. The  
101 diode power density was set at 17.2 mW cm<sup>-2</sup> throughout the photo-switching experiments.  
102 The spatial overlap between the diode and the UV laser spot on the sample plane was  
103 established. Cycling experiments during the photo-switch were performed by remote control  
104 of both laser sources. At  $t = 0$  s, the shutter of the 343 nm laser source was opened until no  
105 changes in the integrated intensity of the (001) reflection from the **DMOF-1** structure was  
106 recorded, then the 450 nm light source was opened for continuous irradiation by closing the  
107 UV shutter.

## 108 Characterization

109 X-Ray diffraction measurements were performed using CuK $\alpha$  radiation ( $\lambda = 0.154$  nm) with the  
110 out-of-plane, in-plane and azimuthal angle dependence of the intensity profiles ( $\varphi$  scan) shown  
111 in the Supplementary Figure S1 (b) (Rigaku diffractometer, SmartLab, Japan).

112 Absorbance measurements for the **DMOF-1** thin films prior and after azobenzene infiltration  
113 were evaluated using a UV-Vis spectrophotometer (Cary 60, Agilent Technologies).

114 Infrared measurements of the pristine and infiltrated system were acquired at SISSI-Bio offline  
115 end station of the SISSI beamline at Elettra Sincrotrone Trieste<sup>[10]</sup> using an interferometer  
116 VERTEX 70 (Bruker Optics, MA,US), equipped with a DTGS detector and a ATR diamond  
117 accessory (MIRACLE, Pike Optics). A reference was collected on the clean crystal and then a  
118 spectrum of the sample was recorded averaging 128 scans at 10 kHz scanner speed, with a  
119 spectral resolution of 2 cm<sup>-1</sup>. The *ex-situ* photo switched ON and OFF states were  
120 characterized by infrared spectroscopy in the spectral range of 400 – 4000 cm<sup>-1</sup> operating in  
121 transmission mode (Alpha-T, Bruker Optics).

122 Morphologies of samples were observed by a scanning electron microscope (Field Emission  
123 Scanning Electron Microscope Gemini Column (FEG) ZEISS SIGMA 300; WD = 7.1 mm;  
124 acceleration voltage 3.00 kV).

125 Quartz crystal microbalance with dissipation (QCM-D) measurements were realized using the  
126 Q-Sense Analyzer (Biolin Scientific), which operates at a resonance frequency of  
127 approximately 5 MHz. The experiments were conducted in ambient air or in saturated methanol  
128 vapor atmosphere with an open module (QOM 401; sensor QSX 301 gold) at 23°C. In brief,  
129 30 µL of methanol were pipetted in droplets on the Teflon surface of the QOM next to the  
130 sensors and covered with a lid measuring 32 x 32 x 9 mm<sup>3</sup>, leading to a saturated methanol  
131 vapor around the sensor. The measurements were conducted by recording the methanol vapor  
132 uptake of every MOF layer (Cu<sub>2</sub>BDC<sub>2</sub>-on-Cu(OH)<sub>2</sub> and subsequent growth of **DMOF-1**(-on-  
133 Cu<sub>2</sub>BDC<sub>2</sub>-on-Cu(OH)<sub>2</sub>). Each coating was repeated at least on three independent sensors.  
134 Reference measurements were made with uncoated sensors, and the mass of the MOF layers  
135 was determined by comparing the resonance frequencies of uncoated and coated crystals in  
136 air. The mass change was calculated according to the Sauerbrey equation, with  $\Delta m \sim C \cdot \Delta f$  ( $C$   
137 = 17.7 ng cm<sup>-2</sup> Hz<sup>-1</sup>).<sup>[11a]</sup>

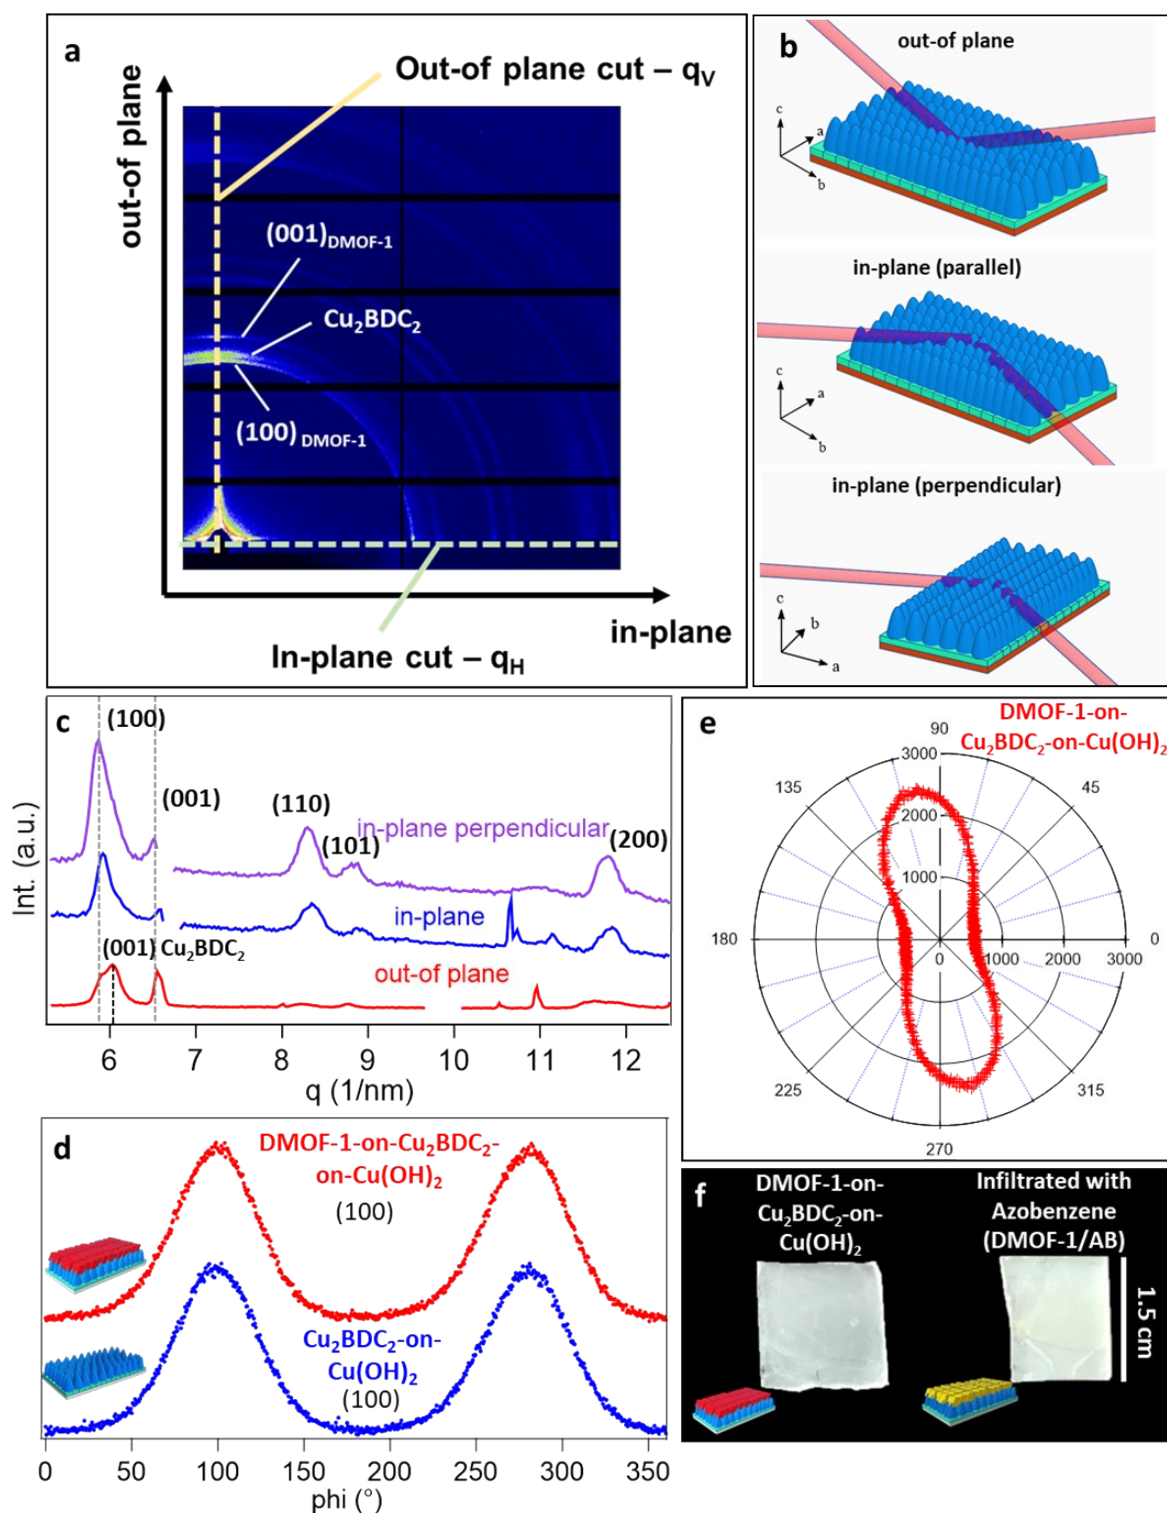

139

**Figure S1 Characterization of DMOF-1 films (glass substrates).** **a**, Integration of 2D detector pattern. Cut margin was selected with 10 pixels for the out-of-plane cut (yellow dotted line) in the  $q_v$  range and the in-plane cut (green dotted line) in the  $q_H$  range. **b**, XRD measurements. Depicts the different X-Ray beam orientations respective to the **DMOF-1** thin

144 film for the out-of-plane, in-plane parallel and in-plane perpendicular. **c**, Out-of-plane and in-  
145 plane GIWAXS patterns of the oriented **DMOF-1** film. **d**, Azimuthal angle dependence of  
146 intensity profiles ( $\varphi$  - scan) of the (100) reflection for **DMOF-1** (red line) and the (100) reflection  
147 of the  $\text{Cu}_2\text{BDC}_2\text{-on-Cu(OH)}_2$  (blue line) with the highest intensity close to 90 and 270°  
148 coinciding, indicating that the *a* and *b* axis are oriented in-plane and parallel to the (100)  
149 reflection of the  $\text{Cu}_2\text{BDC}_2\text{-on-Cu(OH)}_2$ . **e**, Polar plot of the (100) **DMOF-1** reflection. **f**, Grown  
150 **DMOF-1** film on sodalime glass (an opaque film) and upon infiltration by azobenzene (the film  
151 turns yellowish). The film size was usually selected with 1.5 cm x 1.5 cm.

152

### 3. Degree of orientation evaluation

To perform a quantitative analysis, we examined the intensity distribution of the (100) reflection along the azimuthal angle  $\chi$  using the GIXSGUI package (Figure S2 (a-b)).<sup>[12]</sup> The  $\chi$ -plot shown in Figure S2 (c) allows a simple estimation of the degree of orientation ( $DO$ )<sup>[13]</sup> considering the contribution of the isotropic fraction of **DMOF-1/AB** crystallites as highlighted in grey in Figure S2 (d). The  $DO$  is given by

$$DO (\%) = \frac{A_{total} - A_{isotropic}}{A_{total}} \cdot 100$$

where  $A_{total}$  is the area below the integrated intensity as a function of  $\chi$ , and  $A_{isotropic}$  is the isotropic fraction as shown in Figure S2 (d). The calculated  $DO$  was estimated with 45%. This fraction shows that 45% of the **DMOF-1** crystallites have a preferential out-of-plane orientation and is consistent with SEM (Figure S2 (e)).

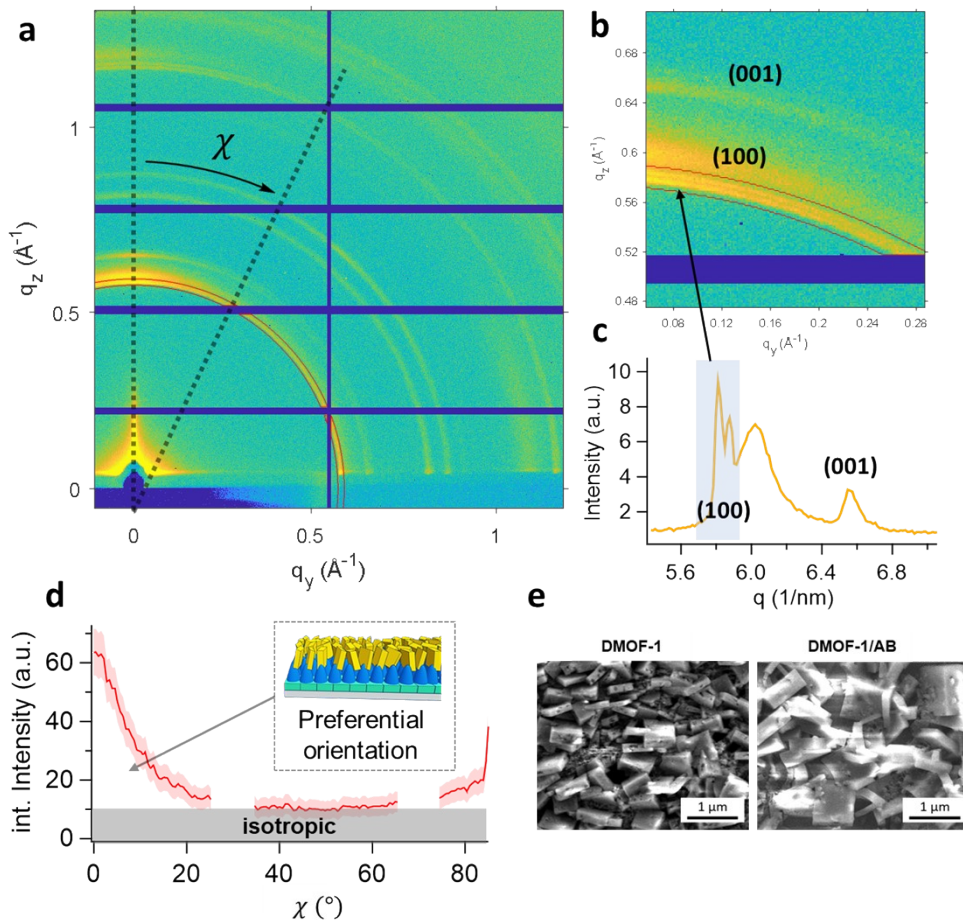

**Figure S2 Evaluation of the degree of orientation.** a, 2D GIWAXS pattern of the **DMOF-1/AB** film (incident angle  $0.3^\circ$ ). The arrow is indicating the direction of azimuthal  $\chi$  integration



167 where vertical dashed line is at  $\chi = 0^\circ$ . **b**, Magnified area of the 2D GIWAXS pattern indicating  
168 the intensity distribution of (100) reflections, **c**, together with the corresponding q-range (dark  
169 arcs). **d**, Integrated intensity as a function of the azimuthal angle  $\chi$  of the **DMOF-1/AB** film. The  
170 grey area indicates the contribution of the isotropic fraction of **DMOF-1/AB** crystallites, whilst  
171 the  $0^\circ$  orientation corresponds to crystallites whose (100) planes are parallel to the substrate  
172 (FWHM =  $18^\circ$ ),<sup>[13]</sup> with the crystallites itself growing perpendicular to the substrate (see  
173 schematics) that is consistent with the SEM images shown in (**e**). **e**, The **DMOF-1** crystallites  
174 retain their morphology after the infiltration by azobenzene into the pores (**DMOF-1/AB**).

175

#### 176 4. Quartz crystal microbalance (QCM) measurements

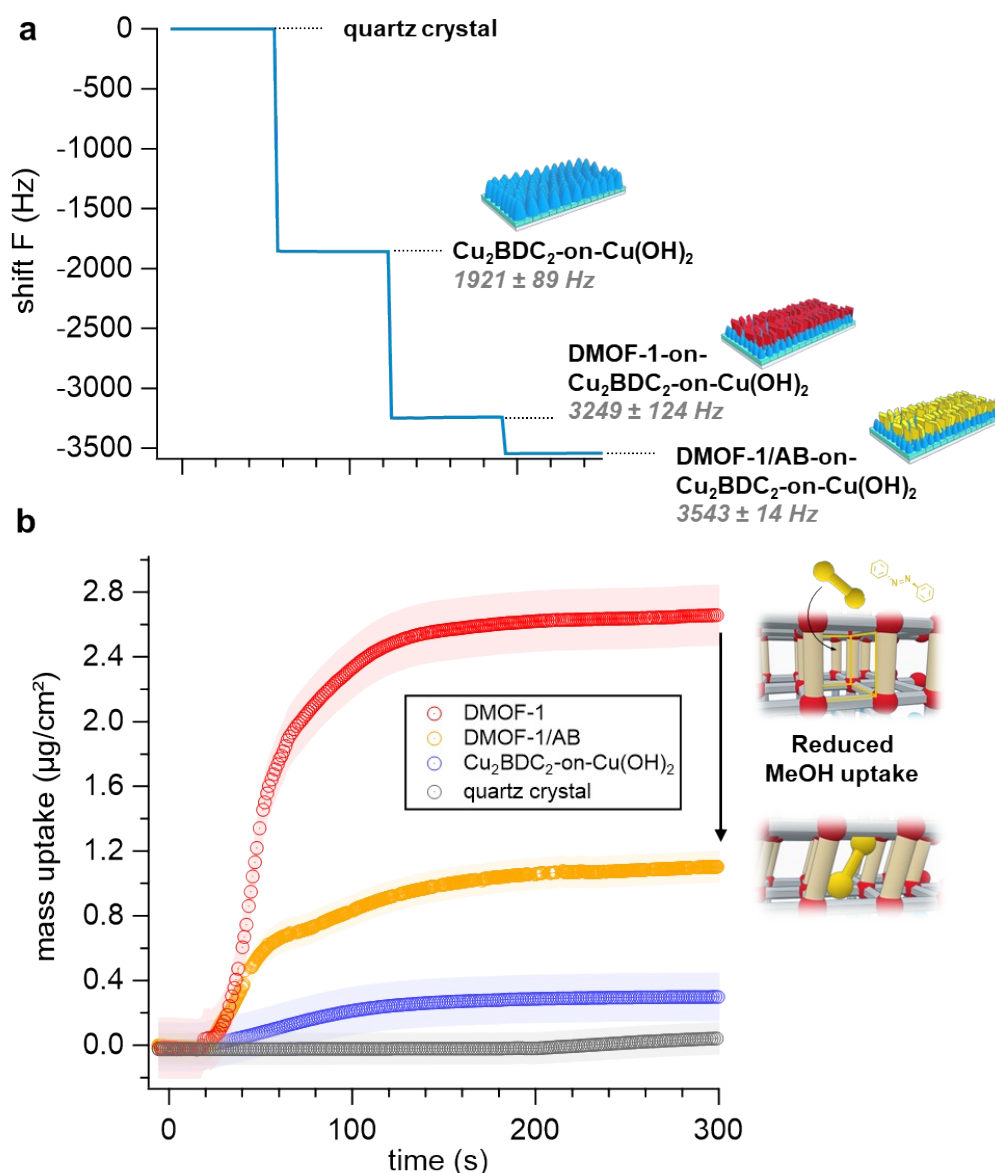

177

178 **Figure S3 Uptake of methanol by the MOF-on-MOF film system measured by QCM-D. a,**  
 179 Gravimetric measurements of the respective film layers in air (**DMOF-1-on-Cu<sub>2</sub>BDC<sub>2</sub>-on-**  
 180 **Cu(OH)<sub>2</sub>**) and upon azobenzene infiltration demonstrate the successive increase in the total  
 181 film mass. **b,** Uptake of methanol vapor by reference quartz crystal (grey trace) is weak  
 182 compared to the first MOF layer, **Cu<sub>2</sub>BDC<sub>2</sub>-on-Cu(OH)<sub>2</sub>** (blue trace), which adsorbs  $0.2 \mu\text{g}/\text{cm}^2$   
 183 that is in good agreement to previously reported results.<sup>[11b]</sup> The subsequent growth of the  
 184 upper **DMOF-1** film layer (red trace) shows a significantly higher methanol uptake ( $2.6 \mu\text{g}/\text{cm}^2$ )  
 185 which is owed to the three-dimensional framework structure.<sup>[6]</sup> Occupying the **DMOF-1** pores  
 186 by azobenzene (**DMOF-1/AB**) suppresses the methanol uptake. The methanol uptake was

187 reduced by 58% upon azobenzene infiltration within the **DMOF-1** pores. The shaded area  
188 corresponds to the 95% confidence interval based on 9 measurements.

## 189 5. Azobenzene infiltration process into DMOF-1 films

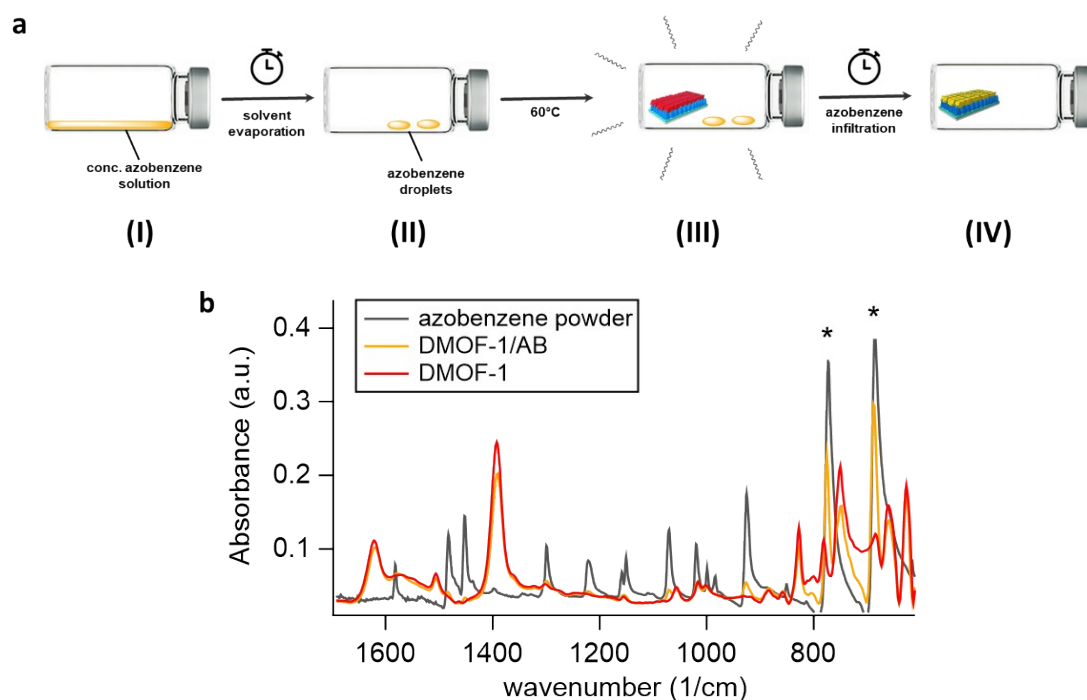

190

191 **Figure S4 DMOF-1 infiltration by azobenzene.** **a**, Schematic description of the azobenzene  
 192 infiltration process. In a glass vial, 60  $\mu\text{L}$  of a 10 mg/mL acetic azobenzene solution is left  
 193 for the solvent to evaporate (I) and azobenzene droplets are left (II). We use acetone as the  
 194 solvent to ensure a complete evaporation prior to the MOF-film placement in order to avoid the  
 195 infiltration of solvent molecules within the MOF pores. The volume is calculated accordingly to  
 196 provide an excess of azobenzene molecules, thus guaranteeing the infiltration of one  
 197 azobenzene per **DMOF-1** pore. The **DMOF-1** film is dried prior to the infiltration at 60°C for  
 198 >15 min to ensure solvent evaporation from the MOF pores, then transferred to the vial  
 199 containing the azobenzene droplets (III). Infiltration by azobenzene is enhanced at 60°C and  
 200 is typically left for >30 min (IV). The film is typically freshly infiltrated prior to the photo-switching  
 201 experiments. **b**, Infrared spectra of azobenzene, **DMOF-1** and **DMOF-1/AB**. Compared to the  
 202 infrared spectrum of powder azobenzene, infiltration of the molecule within the **DMOF-1** pores  
 203 leaves only the vibrational bands located at  $\sim 700$  and  $650\text{ cm}^{-1}$  pronounced in intensity that  
 204 correspond to the C-H vibrations of azobenzene. Other vibrational bands are suppressed upon  
 205 infiltration which indicates that the azobenzene is accommodated within the **DMOF-1**  
 206 pores.<sup>[7a,c]</sup>

207

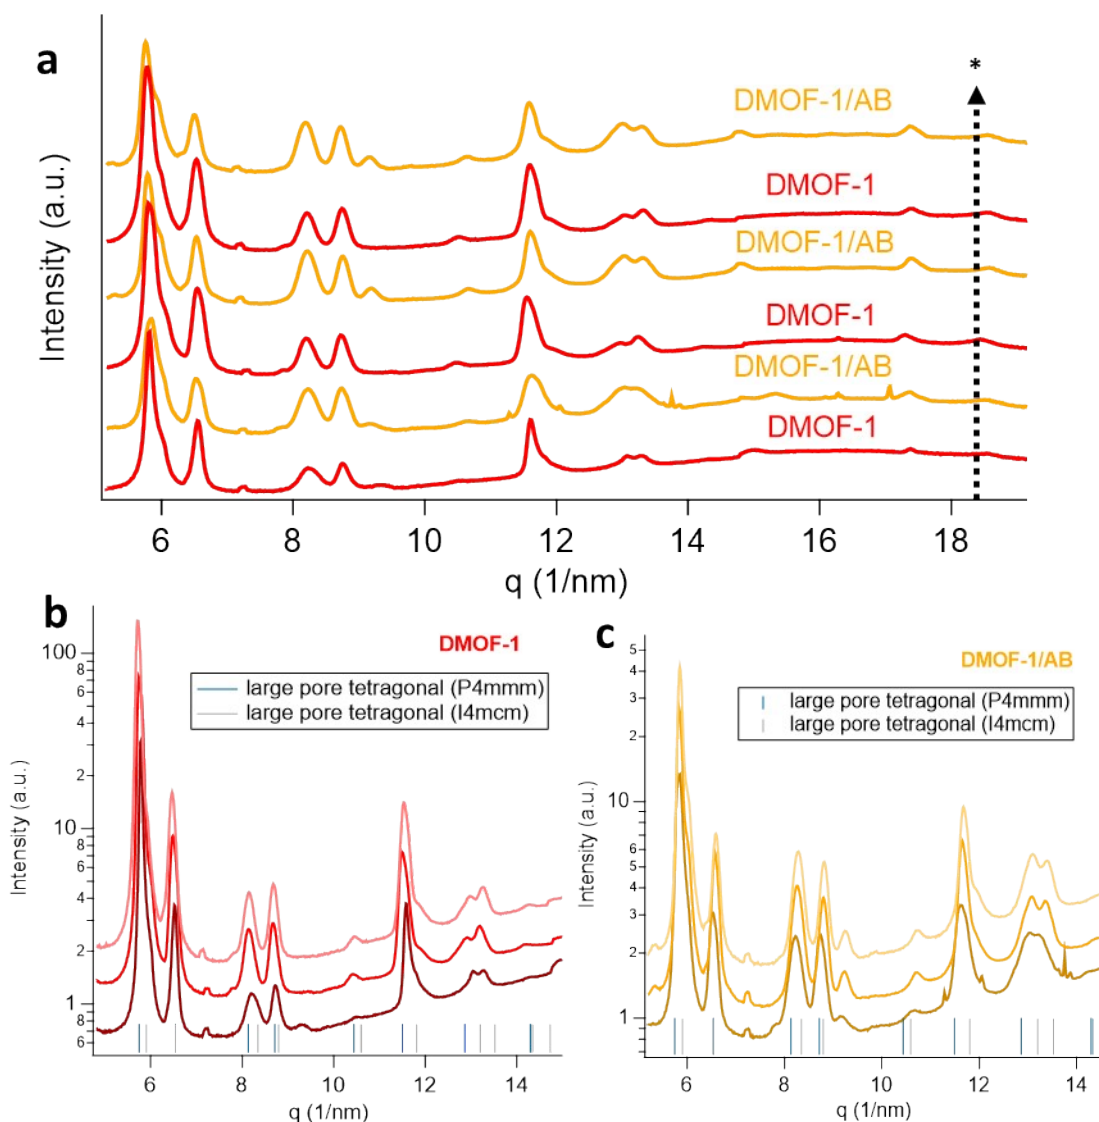

208

209 **Figure S5 Reversible azobenzene infiltration in DMOF-1 films (glass substrates).** a, The  
 210 pristine **DMOF-1** thin film (red traces, b) was infiltrated as described in Figure S4 yielding the  
 211 **DMOF-1/AB** guest-host system (yellow traces, c). Removal of the chromophore was  
 212 performed by washing the film with ethanol and drying in N<sub>2</sub> stream. Repeating the infiltration  
 213 process was found to leave the host system unaltered (arrow indicates the infiltration  
 214 sequence) as displayed with the inset graphs. b, The **DMOF-1** structures were found to match  
 215 the reported large-pore tetragonal *P4/mmm* space group,<sup>[14a]</sup> whilst c, the infiltrated **DMOF-**  
 216 **1/AB** system gives a better match with the expected tetragonal narrow pore *I4/mcm* space  
 217 group.<sup>[14a]</sup>

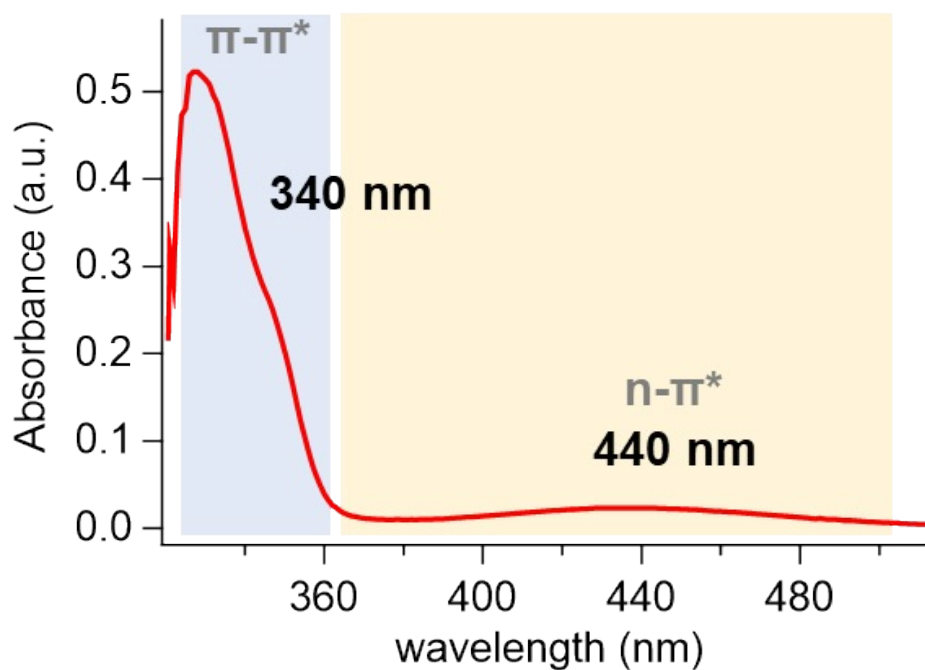

218

219 **Figure S6 UV-Vis spectrum of an acetonic 0.001 mg mL<sup>-1</sup> azobenzene solution.** The  $\pi-\pi^*$   
 220 transition shows the strong absorption band in the ~340 nm range, and the weaker  $n-\pi^*$   
 221 transition in the range of ~440 nm and is coincident with spectra reported in literature. The  
 222 sudden drop in intensity <320 nm is owed to the strong absorption of acetone in the UV  
 223 range.<sup>[14b]</sup>

224

## 225 6. Polarization angle-dependent absorption measurements at 343 nm

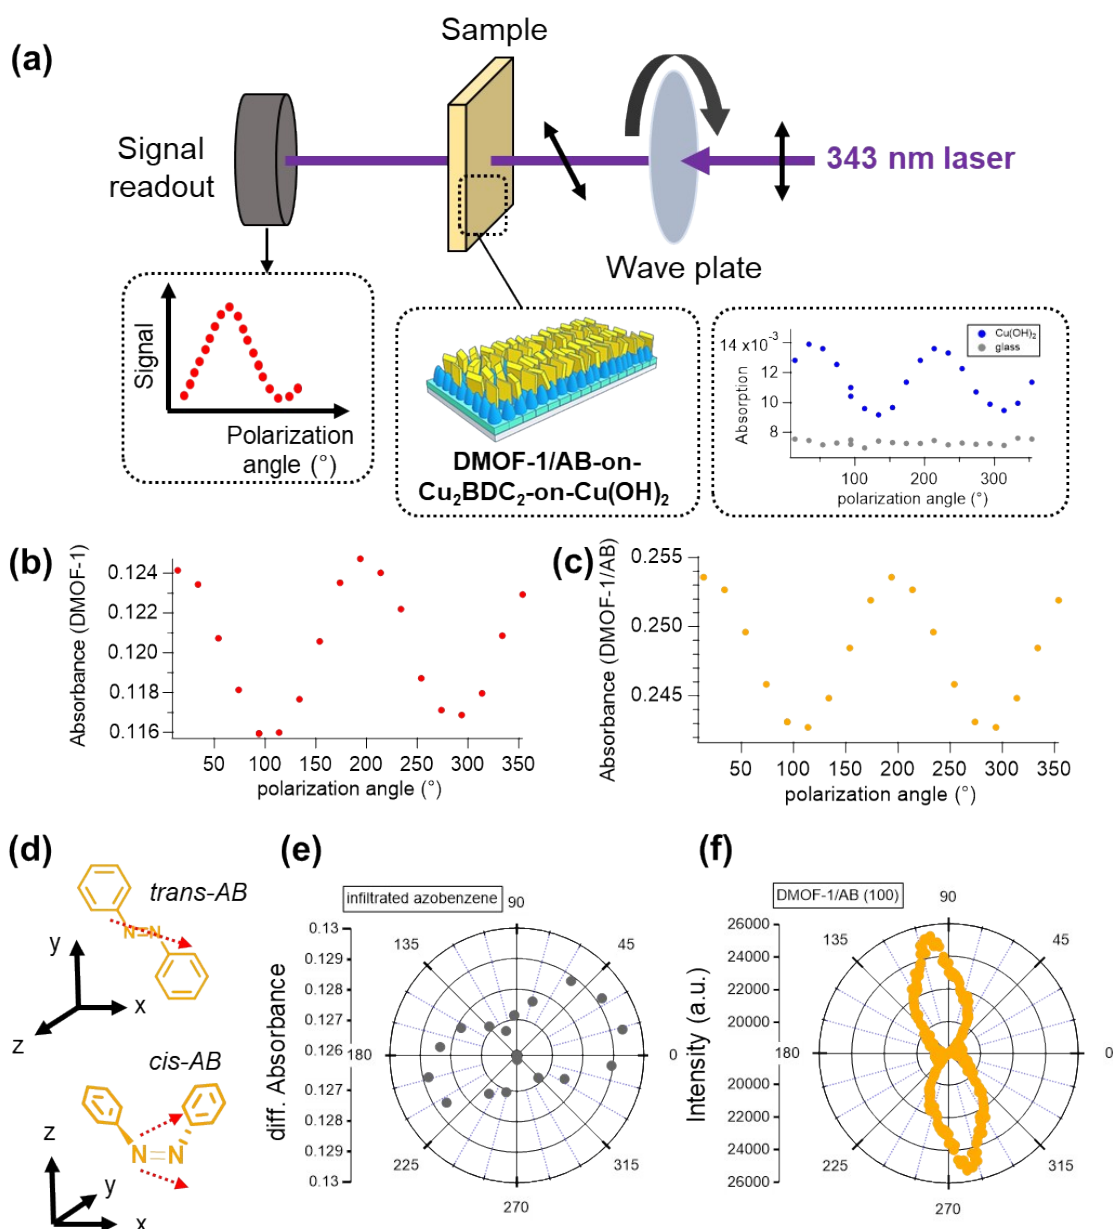

226

227 **Figure S7 Polarization angle-dependent absorption measurements at 343 nm**

228 **wavelength.** a, The polarization angle dependent absorption of the **DMOF-1/AB** films was  
 229 measured using 343 nm wavelength laser source and a half-wave plate (Thorlabs) as  
 230 schematically depicted in the experimental setup. The **DMOF-1/AB** film grown on glass  
 231 substrates was positioned after the half-wave plate, and the intensity of transmitted light was  
 232 measured by a UV-sensitive silicon diode (Thorlabs). Reference measurements were  
 233 performed for bare glass substrates and Cu(OH)<sub>2</sub> nanobelts. No polarization dependency was  
 234 found for the bare glass substrate. **b-c**, Polarization angle dependent measurements of the

235 **DMOF-1** and **DMOF-1/AB** films were found with a strong response, with the absorbance  
236 increasing for the azobenzene infiltrated films. **d**, The transition dipole moment of azobenzene  
237 is schematically depicted and is approximately along the azobenzene N-N bond in *trans*-  
238 configuration.<sup>[1b]</sup> **e**, Difference (**c**) - (**b**) absorption with the most intense response of the  
239 infiltrated azobenzene molecules within the **DMOF-1** pores perpendicular to the (100)  
240 reflection of the **DMOF-1/AB** structure (**f**), testifying a preferential alignment of azobenzene  
241 molecules along the *c*-axis direction.<sup>[1a]</sup> (**f**) Azimuthal angle dependence of intensity profiles (x-  
242 ray  $\varphi$  - scan) of the (100) reflection for the **DMOF-1/AB** structure.

243

244



## 245 7. Time-resolved *in-situ* Grazing Incidence Small Angle X-Ray Scattering

246 The evaluation of the dynamic switching behavior of the **DMOF-1/AB** films was accomplished  
 247 by considering the radial integration. This was mainly due to the better statistics provided by  
 248 the higher number of integrated pixels that consequently provides a better signal-to-noise ratio  
 249 when compared to out-of-plane integrated data. However, the switching constants remain  
 250 irrespective on the integration in the range of the mean statistical error obtained in this study.

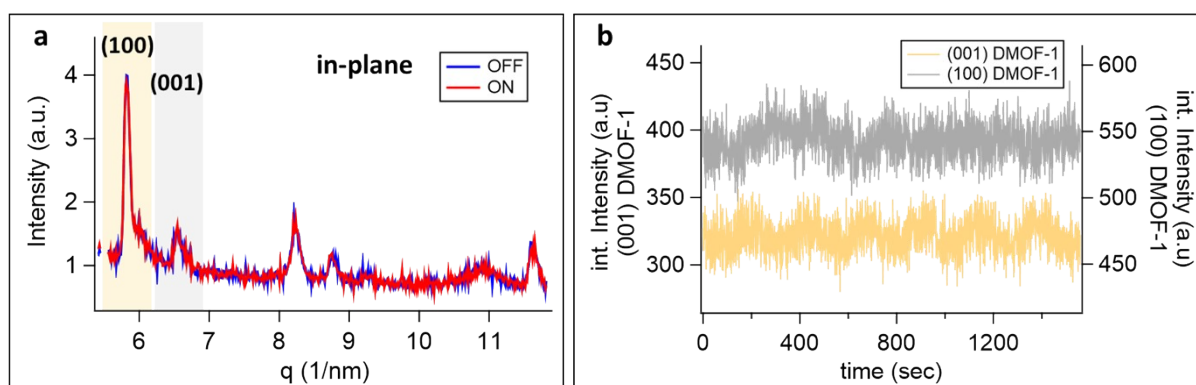

252 **Figure S8 Photo-switching of the DMOF-1/AB structure (glass substrate).** **a**, In-plane  
 253 integration of the **DMOF-1/AB** structure with the ON and OFF with the ON and OFF photo-  
 254 response indicated in red and blue, respectively. The structure was photo-cycled reversibly  
 255 (see Figure S9 b). The yellow and grey areas indicate the range of the integrated intensity for  
 256 the (001) reflection (*yellow*) and the (001) reflection (*grey*) over the course of the photo-cycling  
 257 of the structure. **b**, Integrated intensity throughout the photo-cycling for the (100) and (001)  
 258 reflections shows no structural changes in the in-plane direction due to the rigidly connected  
 259 **DMOF-1** structure to the  $\text{Cu}_2\text{BDC}_2\text{-on-Cu(OH)}_2$ .

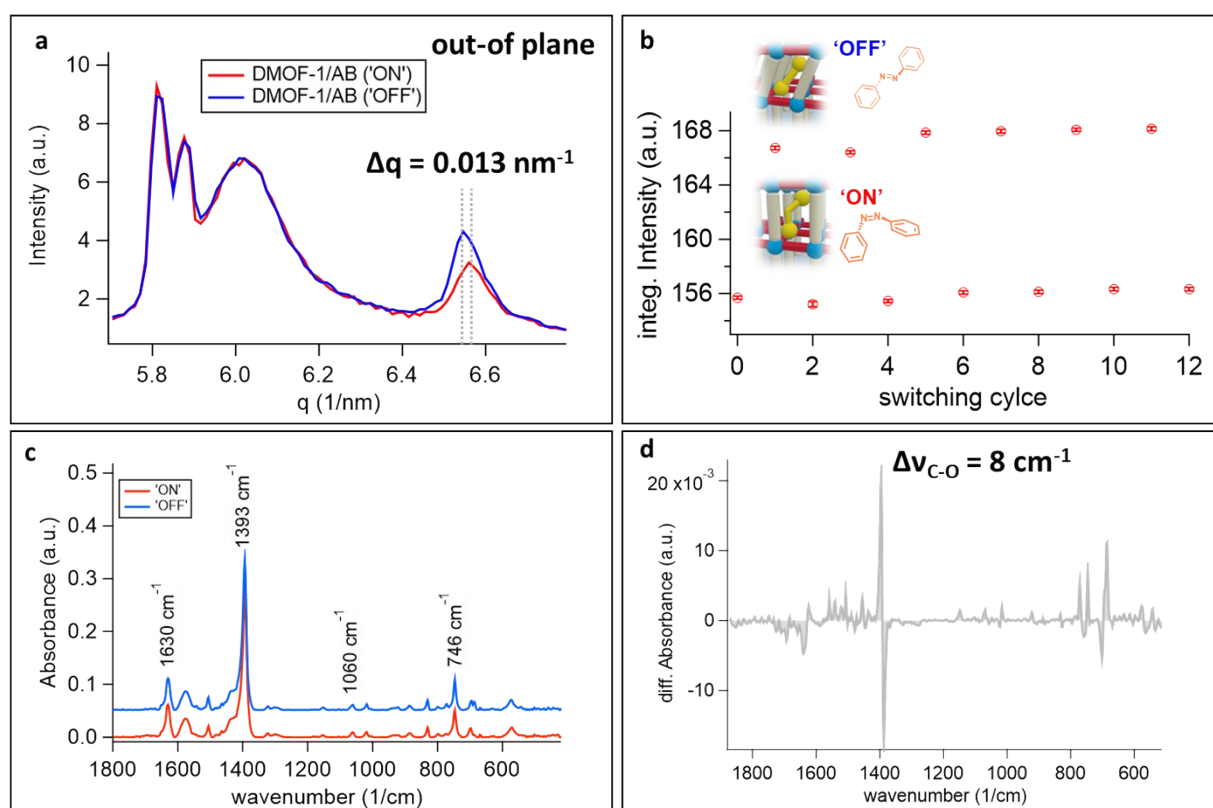

**Figure S9 Photo-switching of the DMOF-1/AB structure (glass substrate).** **a**, Out-of-plane integration of the **DMOF-1/AB** structure with the ON and OFF photo-response indicated in red and blue, respectively. Upon photo-switching, the (001) reflection was determined to undergo a shift by  $\Delta q = 0.013 \text{ nm}^{-1}$  as denoted by the dotted lines. **b**, Photo-switching of **DMOF-1/AB** yields quantitative and fully reversible conversion between the ON and OFF state. The integrated intensity of the (001) reflection for radial integrated data is displayed. **c**, Infrared spectrum of the ON (red trace) and OFF (blue trace). The infrared bands of **DMOF-1/AB** were assigned with  $746 \text{ cm}^{-1}$  and  $1060 \text{ cm}^{-1}$  to correspond to the N-C-H vibrations from the pillaring DABCO. The strong band at  $1393 \text{ cm}^{-1}$  and the weaker band located at  $1630 \text{ cm}^{-1}$  were attributed to the C-O vibrations arising from the carboxylic groups in the **DMOF-1** framework.<sup>[7]</sup> **d**, Difference in absorbance between the ON and OFF state show a shift of  $\Delta \nu = 8 \text{ cm}^{-1}$  for the strong C-O vibrational band located at  $1393 \text{ cm}^{-1}$ .

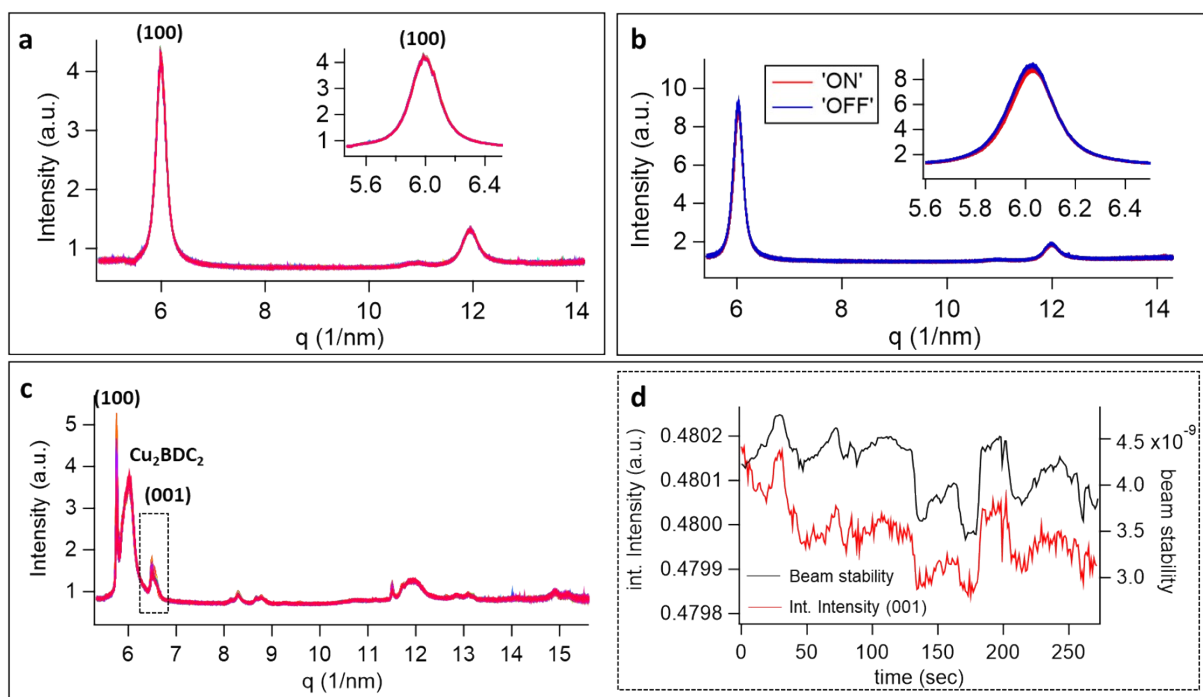

**Figure S10 Photoexcitation of  $\text{Cu}_2\text{BDC}_2$ -on- $\text{Cu}(\text{OH})_2$  films (sodalime glass substrates).**

**a**, UV exposure of the as-prepared  $\text{Cu}_2\text{BDC}_2$ -on- $\text{Cu}(\text{OH})_2$  film. The inset shows the (100) reflection lacking significant structural changes over the entire exposure period. **b**, Upon infiltration of  $\text{Cu}_2\text{BDC}_2$ -on- $\text{Cu}(\text{OH})_2$  by azobenzene and subsequent UV exposure at 343 nm (red trace ON) or to 450 nm (blue trace, OFF) showed no significant changes. **c**, Irradiation of the **DMOF-1**-on- $\text{Cu}_2\text{BDC}_2$ -on- $\text{Cu}(\text{OH})_2$  film system by 343 nm shows no structural changes for the (001) reflection, the variation in the integrated intensity arise solely because of the X-ray beam (**d**).

## 285 8. Photo-switching experiments in bulk DMOF-1

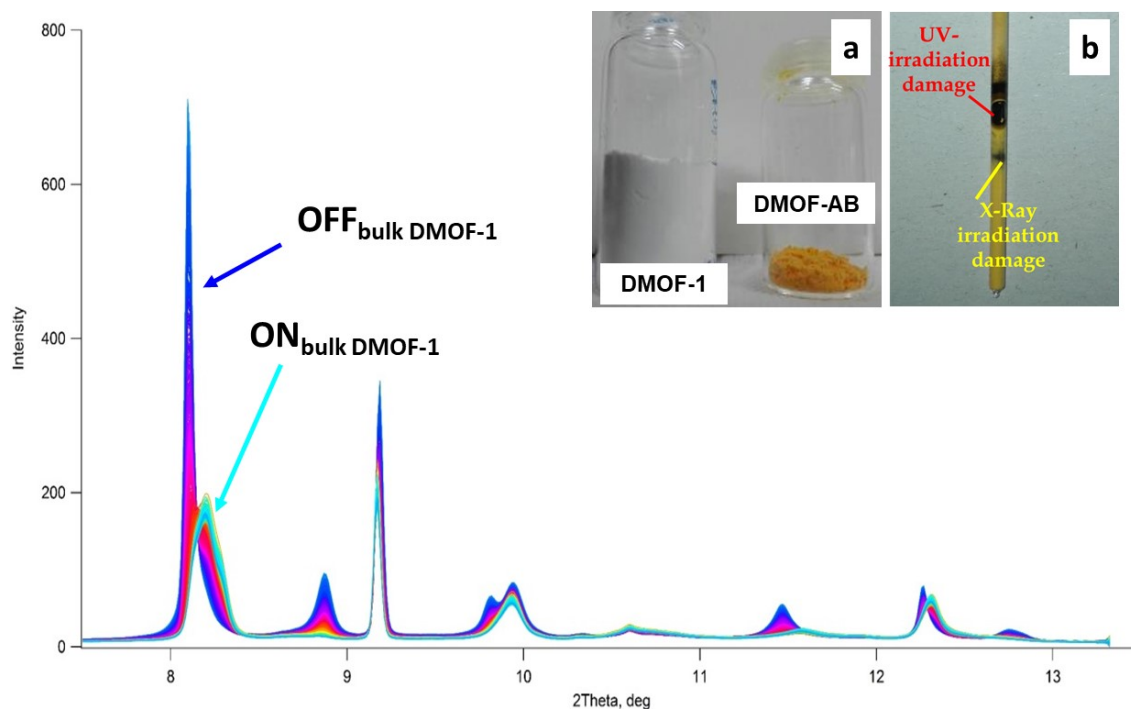

287 **Figure S11 Bulk DMOF-1 photo-switching experiments.** a, Synthesis of DMOF-1 was  
 288 slightly modified compared to literature and performed at ambient pressure.<sup>[6]</sup> In a two-neck  
 289 flask 2.0 g zinc(II) nitrate hexahydrate was mixed with 1.16 g terephthalic acid and 0.38 g  
 290 DABCO in 40 mL DMF and stirred at 120°C for 24 hours under refluxing conditions. The  
 291 colourless precipitate was filtered and dried *in vacuo* prior to infiltration with azobenzene, which  
 292 was performed according to the procedure reported by Yanai et al.<sup>[7]</sup> yielding an orange  
 293 powder. b, The infiltrated DMOF-1 bulk powder with azobenzene was exposed to 343 nm UV  
 294 light (2 W) filled in a quartz capillary (WJM-Glas/Müller GmbH; length = 80 mm, diameter = 1.5  
 295 mm, wall thickness = 0.01 mm) for one hour and continuously exposed to synchrotron X-Ray  
 296 radiation to track ongoing structural changes. Severe irradiation damage was induced due to  
 297 the low light penetration inside of the capillary.<sup>[15]</sup> Shorter exposure to UV light was insufficient  
 298 to induce photo-responsive behaviour. The OFF state (*blue trace*) changed to the ON state  
 299 (*turquoise trace*). These initial photo-switching experiments in bulk revealed that the absorption  
 300 by the quartz capillary and the low light penetration into the powder have to be out-ruled to  
 301 achieve high switching conversion and moreover to allow reliable photophysical  
 302 characterization.<sup>[15]</sup>

9. IR experiments – photo-isomerization of azobenzene within the DMOF-1/AB film structure

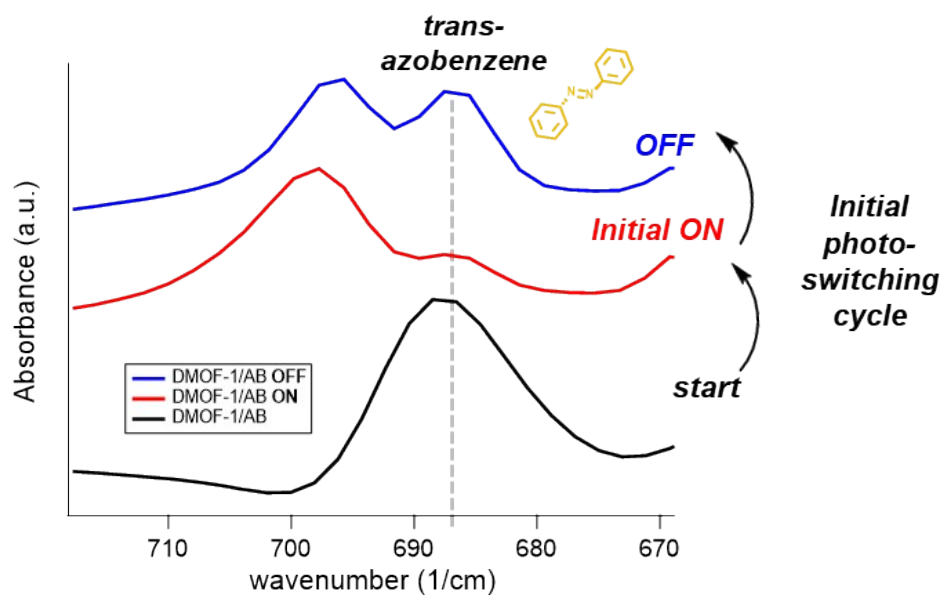

**Figure S12** The freshly infiltrated DMOF-1/AB film structure shows a strong vibrational band at 687  $\text{cm}^{-1}$  that corresponds to the *trans*-azobenzene (black trace). Initial irradiation by 343 nm of the **DMOF-1/AB** structure (ON state) lead to the *cis*-conformer (red trace). Subsequent irradiation by 450 nm revealed only a partial reconversion to the *trans*-isomer (blue trace).

## 10. Calculation of the azobenzene loading

To estimate the azobenzene loading per **DMOF-1** pore, calculations according to Koehler *et al.* [16] were performed with the parameters summarized in Table S1.

The azobenzene concentration within the **DMOF-1** pores is calculated by Eq. S1.

$$c_{AB} = \frac{\Delta A}{(\epsilon_{cis} - \epsilon_{trans}) * d_{DMOF-1\ film} * \Delta x_{AB}} = 0.79 \quad \text{Eq. S1}$$

Considering the unit cell volume of the infiltrated **DMOF-1/AB** system<sup>[7a]</sup> ( $V_{DMOF-1/AB} = 2086 \text{ \AA}^3$ ) and the Avogadro constant ( $N_A = 6.6 \cdot 10^{23}$ ) the loading of azobenzene per unit cell is given by Eq. S2.

$$Loading = c_{AB} * N_A * V_{\frac{DMOF-1}{AB}} = 1.09 \frac{molecules}{unit\ cell} \quad \text{Eq. S2}$$

This calculation comprises certain uncertainties for all variables<sup>[16]</sup> and the azobenzene loading serves as an estimate of 1 molecule per **DMOF-1/AB** cell.

**Table S1 Parameters for the calculation of the azobenzene loading.**  $\Delta A$  denotes the  $\pi$ - $\pi^*$  band,  $\epsilon_{cis-AB}$  and  $\epsilon_{trans-AB}$  the extinction coefficients for the *cis*- and *trans*-isomers.  $\Delta x_{AB}$  refers to the change of the *cis*-content throughout the photo-switch and  $d_{DMOF-1\ film}$  to the thickness of the **DMOF-1/AB** crystallites oriented as the film system.

|                                     |                                 |
|-------------------------------------|---------------------------------|
| $\Delta A (\lambda = 330\text{nm})$ | -0.297                          |
| $\epsilon_{cis-AB}$                 | 2500 L/mol cm <sup>[17]</sup>   |
| $\epsilon_{trans-AB}$               | 22 000 L/mol cm <sup>[18]</sup> |
| $\Delta x_{AB}$                     | 0.40                            |
| thickness $d_{DMOF-1\ film}$        | 0.000048 cm                     |

## 11. Influence of orientation on the photo-switching of DMOF-1/AB films

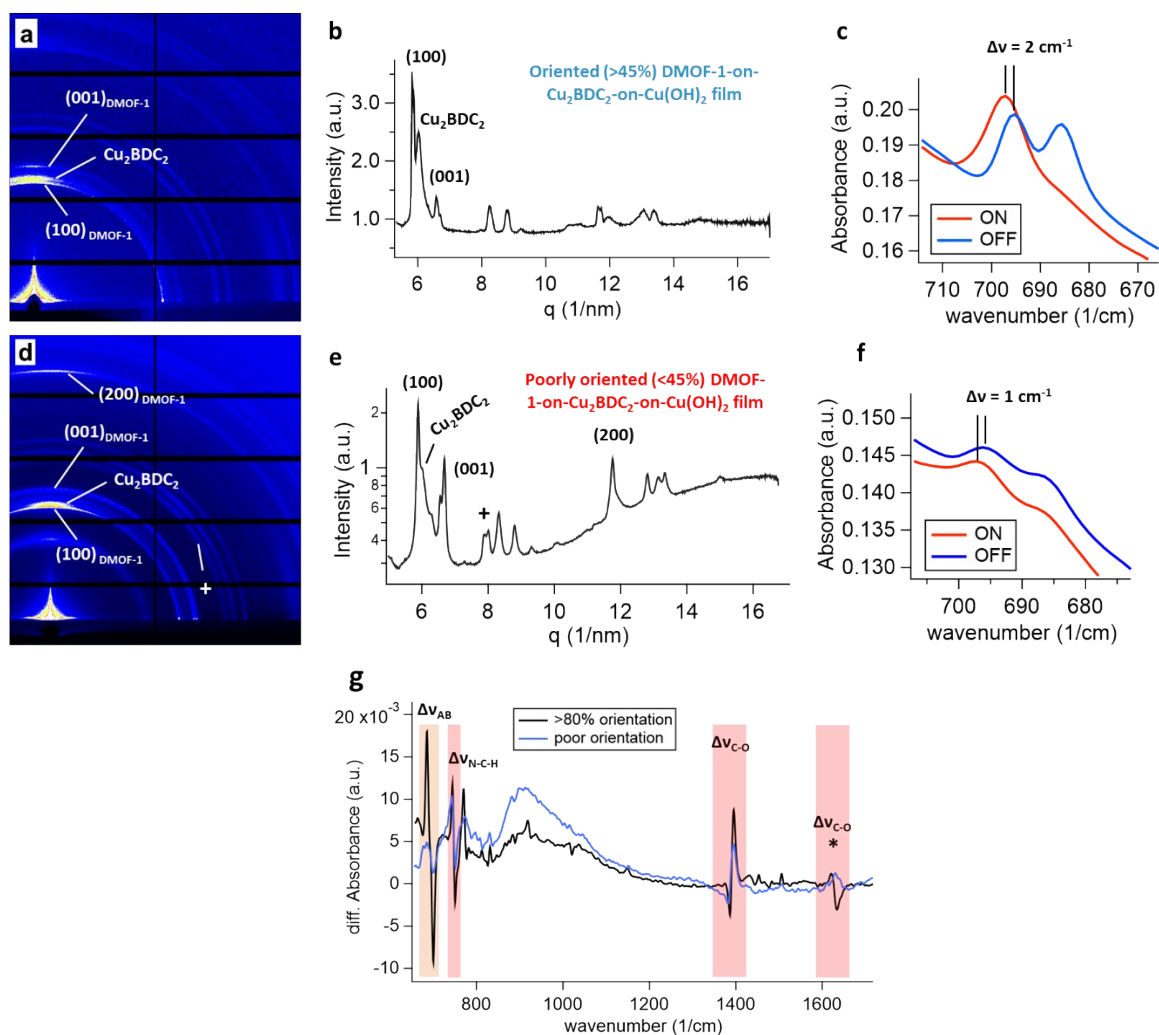

**Figure S13 Influence of DMOF-1-on-Cu<sub>2</sub>BDC<sub>2</sub>-on-Cu(OH)<sub>2</sub> film orientation on photo-switching.** **a**, 2D GIWAXS pattern of the oriented (>45%) **DMOF-1** film,<sup>[2]</sup> with the strong reflections arising from the (100)/(001) planes and the Cu<sub>2</sub>BDC<sub>2</sub> structure indicated in the radial integrated pattern in **(b)**. The azobenzene molecules in the **DMOF-1** pores isomerize between the *trans* and *cis* conformer, which consequently leads to the photo-switch of the **DMOF-1/AB** film structure (ON, OFF). **d-e**, Poorly oriented **DMOF-1** films typically show the appearance of additional strong reflections as indicated by the cross around the (110) and (101) planes. **f**, Azobenzene isomerization is only weakly pronounced indicating weak photo-switching behavior owed to the weaker interactions between the **DMOF-1** and azobenzene ( $\Delta\nu_{AB} = 1 \text{ cm}^{-1}$ ). **g**, The shift in the C-O vibrational band between the ON and the OFF state is either entirely not present for poorly oriented films (indicated by an asterisk), or significantly weakened compared to oriented **DMOF-1/AB** films.

## 12. Infrared measurements for DMOF-1/AB ON/OFF photo-cycling

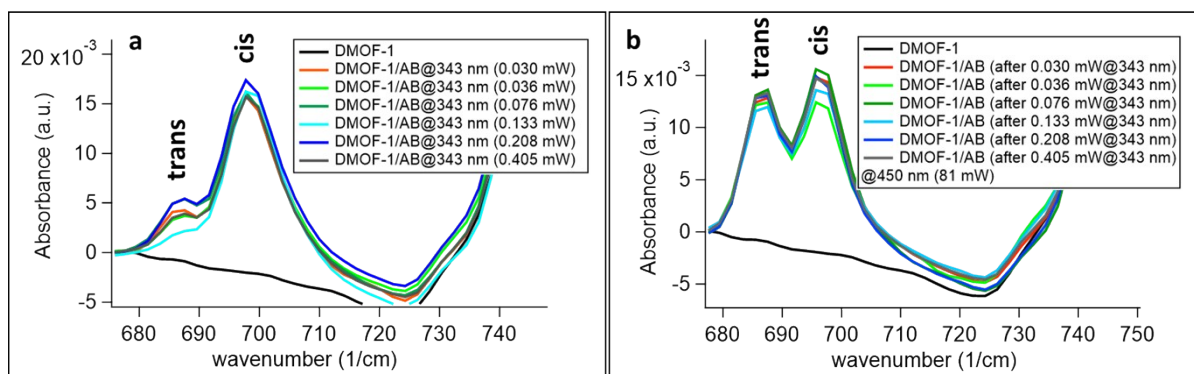

**Figure S14 Infrared measurements on the ON/OFF photo-switching of DMOF-1/AB by varying the irradiation power at 343nm.** **a**, Infrared spectra for the infiltrated azobenzene *trans*  $\rightarrow$  *cis* isomerization at different UV (343 nm) irradiation powers. The pristine **DMOF-1** (black trace) lacks the two infrared bands corresponding to azobenzene. After UV excitation to the ON state, the *cis* band located at  $697\text{ cm}^{-1}$  is strongly pronounced, whilst the *trans* band ( $687\text{ cm}^{-1}$ ) shows a weak contribution and shows a decreasing contribution with increasing UV power. **b**, Back-conversion to the OFF state by LED light (450 nm, 81 mW) the *trans* azobenzene recovers to its relaxed state exhibiting an unaltered infrared intensity which is irrespective on the forward switching UV laser power used during the forward switch.



## 354 References

- 355 [1] (a) P. Falcaro, K. Okada, T. Hara, K. Ikigaki, Y. Tokudome, A. W. Thornton, A. J. Hill, T. Williams,  
356 C. Doonan, M. Takahashi, *Nature Mater* **2017**, 16, 342. (b) T. Yankova, N. Chumakova, D.  
357 Pomogailo, A. Vorobiev, *Liquid Crystals* **2013**, 40, 1135-1145.
- 358 [2] Linares-Moreau, M., Brandner, L. A., Kamencek, T., Klokic, S., Carraro, F., Okada, K., Takahashi,  
359 M., Zojer, E., Doonan, C. J., Falcaro, P., *Adv. Mat. Interfaces* **2021**, 8, 2101039.
- 360 [3] H. Amenitsch, M. Rappolt, M. Kriechbaum, H. Mio, P. Laggner, S. Bernstorff, *J. Synchrotron Rad.*  
361 **1998**, 5, 506.
- 362 [4] M. Burian, C. Meisenbichler, D. Naumenko, H. Amenitsch, SAXSDOG: open software for real-  
363 time azimuthal integration of 2D scattering images, **2020**.
- 364 [5] B. H. Toby, R. B. von Dreele, *J Appl Crystallogr* **2013**, 46, 544.
- 365 [6] D. N. Dybtsev, H. Chun, K. Kim, *Angew. Chem. Int. Ed.* **2004**, 43, 5033.
- 366 [7] a) N. Yanai, T. Uemura, M. Inoue, R. Matsuda, T. Fukushima, M. Tsujimoto, S. Isoda, S.  
367 Kitagawa, *JACS* **2012**, 134, 4501. b) Nabipour, H., Soltani, B. & Ahmadi Nasab, N. *J Inorg*  
368 *Organomet Polym* **2018**, 28, 1206–1213. c) M. Rödl, S. Kerschbaumer, H. Kopacka, L. Blaser, F.  
369 R. S. Purtscher, H. Huppertz, T. S. Hofer, H. A. Schwartz, *RSC Adv.* **2021**, 11, 3917.
- 370 [8] K. Okada, M. Nakanishi, K. Ikigaki, Y. Tokudome, P. Falcaro, C. J. Doonan, M. Takahashi, *Chem.*  
371 *Sci.* **2020**, 11, 8005.
- 372 [9] M. Burian, B. Marmiroli, A. Radeticchio, C. Morello, D. Naumenko, G. Biasiol, H. Amenitsch, *J.*  
373 *Synchrotron Rad.* **2020**, 27, 51.
- 374 [10] S. Lupi, A. Nucara, A. Perucchi, P. Calvani, M. Ortolani, L. Quaroni, M. Kiskinova, *J. Opt. Soc.*  
375 *Am. B* **2007**, 24, 959.
- 376 [11] a) D. Johannsmann, *Springer*, **2015**. b) T. Stassin, S. Rodríguez-Hermida, B. Schrode, A. Cruz,  
377 F. Carraro, D. Kravchenko, V. Creemers, I. Stassen, T. Hauffman, D. De Vos et al., *Chem.*  
378 *Commun.* 2019, **55**, 10056-10059.
- 379 [12] Z. Jiang, *J Appl Crystallogr* **2015**, 48, 917.
- 380 [13] L. Oesinghaus, J. Schlipf, N. Giesbrecht, L. Song, Y. Hu, T. Bein, P. Docampo, P. Müller-  
381 Buschbaum, *Adv. Mater. Interfaces* **2016**, 3, 1600403.
- 382 [14] a) K. Griffiths, N. R. Halcovitch, J. M. Griffin, *Chem. Mater.* **2020**, 32, 9925. b) J. D. Koch, J.  
383 Gronki, R. K. Hanson, *J Quant. Spectrosc. Radiat. Transf. J Quant Spectrosc. Ra.* **2008**, 109,  
384 2037.
- 385 [15] R. Haldar, L. Heinke, C. Wöll, *Adv. Mater.* **2020**, 32, e1905227.
- 386 [16] T. Koehler, I. Strauss, A. Mundstock, J. Caro, F. Marlow, *The Journal of Physical Chemistry*  
387 *Letters* **2021**, 12, 8903-8908.
- 388 [17] Rau, H., Photoisomerization of Azobenzenes. *In Photochemistry and Photophysics*, Rabek, J. D.,  
389 Ed. CRC Press: **1989**.
- 390 [18] Knoll, H., Photoisomerism of Azobenzenes. *In CRC Handbook of Organic Photochemistry and*  
391 *Photobiology*, Horspool, W.; Lenci, F., Eds. CRC Press: **2004**.
